# Supplementary material for: Expression of Genes Related to Prostaglandin Synthesis or Signaling in Human Subcutaneous and Omental Adipose Tissue: Depot Differences and Modulation by Adipogenesis
Source: Hindawi journal article supplement (doi:10.1155/2014/451620), 2014-01-01
Supplement: f1 [file 451620.f1.pdf]

1 SUPPLEMENTAL DATA

2 Table 1. Oligonucleotides used in realtime RT-PCR quantification

| Gene Symbol    | Description                                                        | GenBank   | Oligonucleotide Sequence 5' → 3'                        |           |
|----------------|--------------------------------------------------------------------|-----------|---------------------------------------------------------|-----------|
|                |                                                                    |           | Sense/                                                  | Antisense |
| <b>PLA2G4</b>  | Phospholipase A2, group IVA                                        | NM_024420 | AAGGACGTGCTGGGAAGGTACA/<br>GGGATACGGCAGGTAAATGTG        |           |
| <b>PLA2G16</b> | Homo sapiens phospholipase A2, group XVI (PLA2G16)                 | NM_007069 | AGCCTAAGCCTGGAGACCTGAT/<br>GCCACATCATAACAGCAATTCCTTCTT  |           |
| <b>PTGS1</b>   | Prostaglandin-endoperoxide synthase 1 (cyclooxygenase 1)           | NM_000962 | TTGGGGAGAGTATGATAGAGATTG/<br>CGGAAGGAAACGTAGGGACAG      |           |
| <b>PTGS2</b>   | Prostaglandin-endoperoxide synthase 2 (cyclooxygenase 2)           | NM_000963 | ATGGGTAATGTTATATGTTCTCCTGC/<br>TGGTGACTGTTTTAATGAGCTCTG |           |
| <b>PTGES</b>   | Prostaglandin E synthase                                           | NM_004878 | GGCTATACCTGGGGACTTGATG/<br>CAGGAATCCAAGGGGCTAAGA        |           |
| <b>PTGES2</b>  | Prostaglandin E synthase 2                                         | NM_025072 | AGCCTTCTCGACTTCCATGC/<br>GGTCTTGAGGGCGCTGATGAT          |           |
| <b>PTGES3</b>  | Prostaglandin E synthase 3                                         | NM_006601 | CAAGCATAAAAGAACGGACAGATCA/<br>AATCATCATCTGCTCCATCTACTTC |           |
| <b>PTGIS</b>   | Prostaglandin I2 (prostacyclin) synthase                           | NM_000961 | ATGCCTGCGAGAGACCCTACA/<br>GCAAGTCACCTCACCTCTCAGTT       |           |
| <b>PTGDS</b>   | Prostaglandin D2 synthase                                          | NM_000954 | TACAGCTACCGGAGTCCCCAC/<br>TATCCTCTGTGAAGCCCTGGG         |           |
| <b>AKR1B1</b>  | Aldo-keto reductase family 1B1                                     | NM_001628 | GATCGCAGCCAAGCACAATAA/<br>ACAGCTCAACAAGGCACAGAC         |           |
| <b>PTGFR</b>   | Prostaglandin F receptor (FP)                                      | NM_000959 | CCTTGCCATCGCCATTCTCAT/<br>CCAGAAAACACCATGCAGATACC       |           |
| <b>PTGER1</b>  | Prostaglandin E receptor 1 (EP1)                                   | NM_000955 | TCGCTTCGGCCTCCACCTTCT/<br>CAGCGCCACCAACACCAGCAT         |           |
| <b>PTGER2</b>  | Prostaglandin E receptor 2 (EP2)                                   | NM_000956 | TGCAACTTCAGTGTCATTCTCAACCT/<br>GCAGACGGCGAAGGTGATGGT    |           |
| <b>PTGER3</b>  | Prostaglandin E receptor 3 (EP3)                                   | NM_198714 | CTGGTCTCCGCTCCTGATAAT/<br>CAGCAGGTAAACCCAAGGATCC        |           |
| <b>PTGER4</b>  | Prostaglandin E receptor 4 (EP4)                                   | NM_000958 | CGCCGAGATCCAGATGGTCAT/<br>CGGCAGAAGAGGCATTTGATC         |           |
| <b>PPARG</b>   | Peroxisome proliferator-activated receptor gamma                   | NM_138712 | GTCGGATCCACAAAAAAGTAGAA/<br>AGCGGAAGGACTTTATGTATGA      |           |
| <b>ATP5O</b>   | ATP synthase, H+ transporting, mitochondrial F1 complex, O subunit | NM_001697 | ATTGAAGGTCGCTATGCCACAG/<br>AACGACTCCTTGGGTATTGCTTAA     |           |
| <b>G6PD</b>    | Glucose-6-phosphate dehydrogenase                                  | NM_000402 | GATGTCCCCTGTCCCACCAACTCTG/<br>GCAGGGCATTGAGGTTGGGGAG    |           |
